# Supplementary material for: An AI based approach to evaluate students old script writings
Source: Research Square preprint supplement (doi:10.21203/rs.3.rs-4134529/v1), 2024-03-24
Supplement: Supplementary file 1 [file 8af152710f2e659abd2a4a05.pdf]

**RESEARCH QUESTIONNAIRE**  
**EVALUATION ON BATAK TOBA CHARACTER WRITING OF JUNIOR HIGH STUDENT\*)**

**Respondent Name** :

**Please choose an answer by putting a cross marker (X) on the given box.**

| Num | Question                                                                                                                   | Strongly agree           | Agree                    | Disagree                 | Strongly disagree        |
|-----|----------------------------------------------------------------------------------------------------------------------------|--------------------------|--------------------------|--------------------------|--------------------------|
| 1.  | Written Batak language is easy to learn.                                                                                   | <input type="checkbox"/> | <input type="checkbox"/> | <input type="checkbox"/> | <input type="checkbox"/> |
| 2.  | Batak characters are easy to know by heart.                                                                                | <input type="checkbox"/> | <input type="checkbox"/> | <input type="checkbox"/> | <input type="checkbox"/> |
| 3.  | The available Batak characters can be used to write various phrases in Batak language.                                     | <input type="checkbox"/> | <input type="checkbox"/> | <input type="checkbox"/> | <input type="checkbox"/> |
| 4.  | The available Batak characters can be used to write various phrases in languages other than Batak language.                | <input type="checkbox"/> | <input type="checkbox"/> | <input type="checkbox"/> | <input type="checkbox"/> |
| 5.  | Writing using Batak characters can be used to express opinions.                                                            | <input type="checkbox"/> | <input type="checkbox"/> | <input type="checkbox"/> | <input type="checkbox"/> |
| 6.  | Phrases wrote in Batak characters on certain location can enhance community acceptance.                                    | <input type="checkbox"/> | <input type="checkbox"/> | <input type="checkbox"/> | <input type="checkbox"/> |
| 7.  | Preservation of Batak written language is a necessity.                                                                     | <input type="checkbox"/> | <input type="checkbox"/> | <input type="checkbox"/> | <input type="checkbox"/> |
| 8.  | Writing with Batak characters in this test is beneficial to preserve Batak culture.                                        | <input type="checkbox"/> | <input type="checkbox"/> | <input type="checkbox"/> | <input type="checkbox"/> |
| 9.  | Teaching Batak written language is necessary in schools.                                                                   | <input type="checkbox"/> | <input type="checkbox"/> | <input type="checkbox"/> | <input type="checkbox"/> |
| 10. | Batak written language is necessary to be taught since primary school.                                                     | <input type="checkbox"/> | <input type="checkbox"/> | <input type="checkbox"/> | <input type="checkbox"/> |
| 11. | Learning Batak written language on junior high is very appropriate.                                                        | <input type="checkbox"/> | <input type="checkbox"/> | <input type="checkbox"/> | <input type="checkbox"/> |
| 12. | Batak written language is also necessary to be learnt by people other than Batak tribe.                                    | <input type="checkbox"/> | <input type="checkbox"/> | <input type="checkbox"/> | <input type="checkbox"/> |
| 13. | Writing Batak characters using pen and paper is easy to be done.                                                           | <input type="checkbox"/> | <input type="checkbox"/> | <input type="checkbox"/> | <input type="checkbox"/> |
| 14. | Using <i>digital graphic drawing pen tablet</i> to write Batak characters is easy.                                         | <input type="checkbox"/> | <input type="checkbox"/> | <input type="checkbox"/> | <input type="checkbox"/> |
| 15. | Proficiency in Batak written language could only be achieved by continuous exercise.                                       | <input type="checkbox"/> | <input type="checkbox"/> | <input type="checkbox"/> | <input type="checkbox"/> |
| 16. | Writing in Batak characters has been a daily habit.                                                                        | <input type="checkbox"/> | <input type="checkbox"/> | <input type="checkbox"/> | <input type="checkbox"/> |
| 17. | Learning Batak written language requires high skill.                                                                       | <input type="checkbox"/> | <input type="checkbox"/> | <input type="checkbox"/> | <input type="checkbox"/> |
| 18. | Writing in Batak characters can also be conducted to write other than Batak language.                                      | <input type="checkbox"/> | <input type="checkbox"/> | <input type="checkbox"/> | <input type="checkbox"/> |
| 19. | In this activity, the writings of Batak characters have high benefit.                                                      | <input type="checkbox"/> | <input type="checkbox"/> | <input type="checkbox"/> | <input type="checkbox"/> |
| 20. | Satisfiability in using this Batak character writing app has been achieved due to the availability of necessary functions. | <input type="checkbox"/> | <input type="checkbox"/> | <input type="checkbox"/> | <input type="checkbox"/> |

\*) Adapted from Bahasa Indonesia
